# Supplementary material for: Uncertainties In The Effectiveness of Biological Control of Stem Borers Under Different Climate Change Scenarios In Eastern Africa
Source: Research Square preprint supplement (doi:10.21203/rs.3.rs-876884/v1), 2021-09-22
Supplement: Supplementary file 1 [file 3ef3b558c731c11e46019431.docx]

**Article title**: Uncertainties in the effectiveness of biological control of stem borers under different climate change scenarios in Eastern Africa

**Journal name**: Climatic Change

**Author names**: Ines Jendritzki, Henri E. Z. Tonnang, Paul-André Calatayud, Christian Borgemeister, Tino Johansson, Lisa Biber-Freudenberger

**Affiliation and e-mail address of the corresponding author**: Center for Development Research, Department of Ecology and Natural Resources Management, University of Bonn, ijendrit@uni-bonn.de


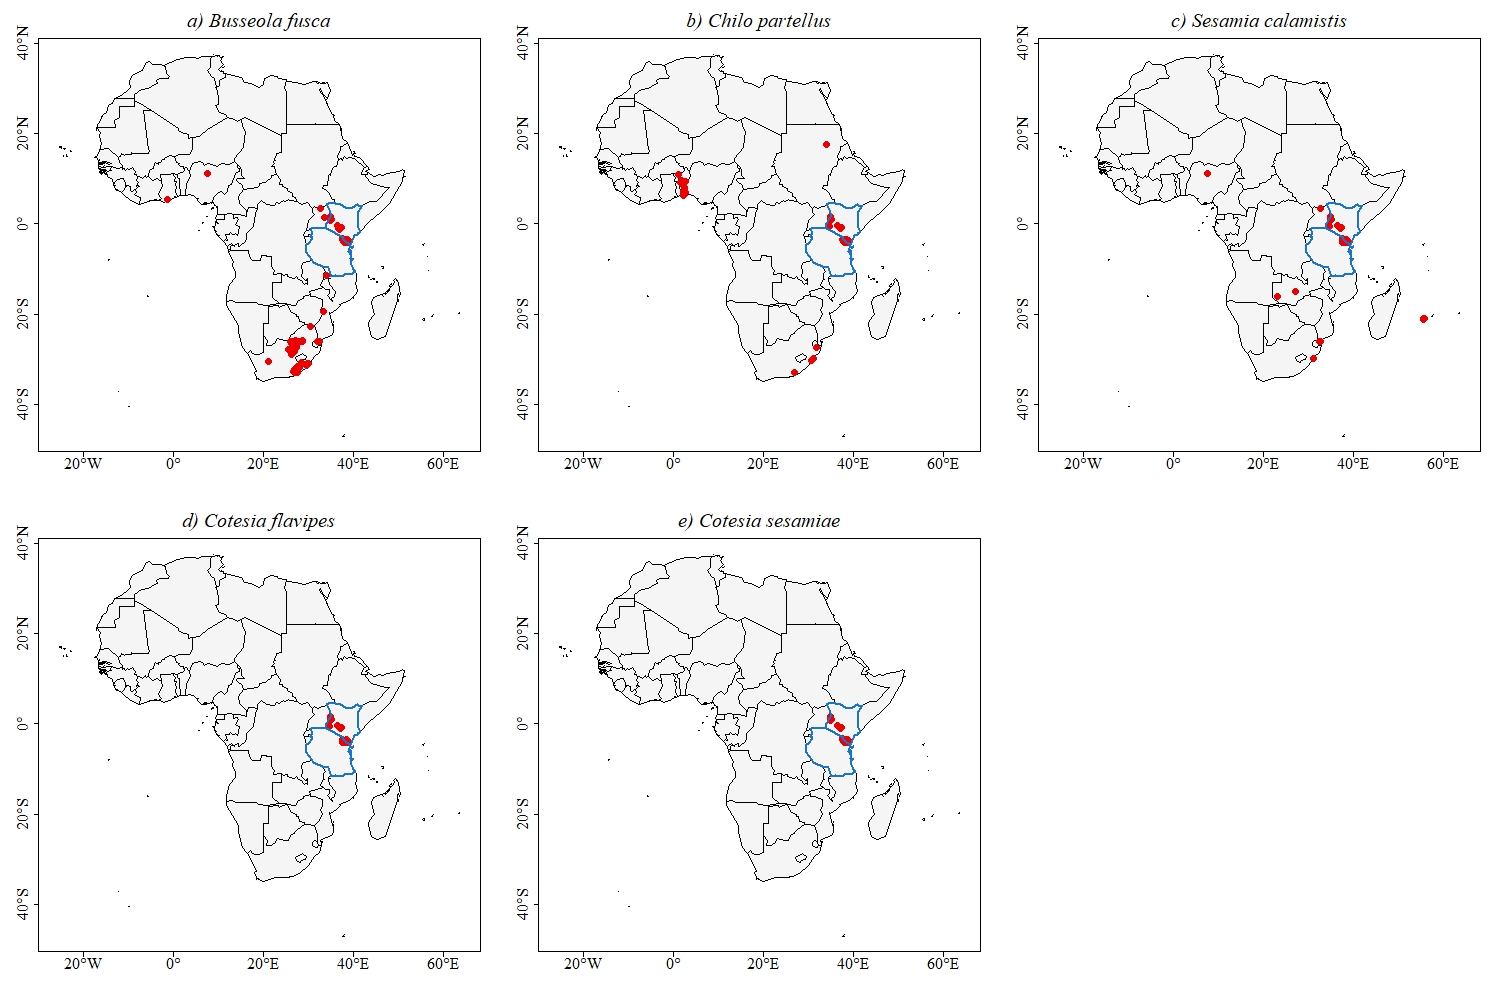


**Fig**: Distribution of species’ presence points used for species distribution modelling
