# Supplementary material for: Uncertainties In The Effectiveness of Biological Control of Stem Borers Under Different Climate Change Scenarios In Eastern Africa
Source: Research Square preprint supplement (doi:10.21203/rs.3.rs-876884/v1), 2021-09-22
Supplement: Supplementary file 2 [file 4a984f8411de0f8871a551b0.docx]

**Article title**: Uncertainties in the effectiveness of biological control of stem borers under different climate change scenarios in Eastern Africa

**Journal name**: Climatic Change

**Author names**: Ines Jendritzki, Henri E. Z. Tonnang, Paul-André Calatayud, Christian Borgemeister, Tino Johansson, Lisa Biber-Freudenberger

**Affiliation and e-mail address of the corresponding author**: Center for Development Research, Department of Ecology and Natural Resources Management, University of Bonn, ijendrit@uni-bonn.de

**Table**: Best-performing model out of 279 calibrated models according to statistical significance (partial Receiver Operating Characteristics (pROC)), predictive ability (Omission Rate (OR) at 5%) and complexity (Akaike information criterion (AICc))

| Species | Model | Mean AUC ratio | pROC | OR at 5% | AICc | num_parameters |
| --- | --- | --- | --- | --- | --- | --- |
| *Busseola fusca* | M_1_F_qt_Set1 | 1.919 | 0 | 0.038 | 10136.03 | 73 |
| *Chilo partellus* | M_1_F_qph_Set2 | 1.815 | 0 | 0.048 | 5655.496 | 66 |
| *Sesamia calamistis* | M_0.1_F_lq_Set1 | 1.962 | 0 | 0.034 | 5331.009 | 30 |
| *Cotesia flavipes* | M_1_F_lqt_Set1 | 1.994 | 0 | 0.048 | 3510.581 | 34 |
| *Cotesia sesamiae* | M_0.1_F_lq_Set1 | 1.983 | 0 | 0.032 | 3575.559 | 29 |
